# Supplementary material for: MicroRNA-7450 regulates non-thermal plasma-induced chicken Sertoli cell apoptosis via adenosine monophosphate-activated protein kinase activation
Source: PubMed Central journal article supplement (PMC5993736; doi:10.1038/s41598-018-27123-8), 2018-06-08
Supplement: 41598_2018_27123_MOESM1_ESM.pdf [file 41598_2018_27123_MOESM1_ESM.pdf]

## Supplementary Information

### **MicroRNA-7450 regulates non-thermal plasma-induced chicken Sertoli cell apoptosis via adenosine monophosphate-activated protein kinase activation**

Jiao Jiao Zhang<sup>1</sup>, Xian Zhong Wang<sup>2</sup>, Huynh Luong Do<sup>1</sup>, Nisansala Chandimali<sup>1</sup>, Tae Yoon Kang<sup>1</sup>, Nameun Kim<sup>1</sup>, Mrinmoy Ghosh<sup>1</sup>, Sang Baek Lee<sup>3</sup>, Young Sun Mok<sup>3</sup>, Seong Bong Kim<sup>4</sup>, Taeho Kwon<sup>5,\*</sup>, Dong Kee Jeong<sup>1,5,\*</sup>

<sup>1</sup> Laboratory of Animal Genetic Engineering and Stem Cell Biology, Department of Advanced Convergence Technology and Science, Jeju National University, Jeju 63243, Republic of Korea

<sup>2</sup> Chongqing Key Laboratory of Forage and Herbivore, College of Animal Science and Technology, Southwest University, Chongqing 400715, P. R. China

<sup>3</sup> Department of Chemical and Biological Engineering, Jeju National University, Jeju 63243, Republic of Korea

<sup>4</sup> Plasma Technology Research Center, National Fusion Research Institute, Gunsan-si, Jeollabuk-Do 54004, Republic of Korea

<sup>5</sup> Laboratory of Animal Genetic Engineering and Stem Cell Biology, Subtropical/Tropical Organism Gene Bank, Jeju National University, Jeju 63243, Republic of Korea

\*Correspondence and requests for materials should be addressed to D.K.J. (E-mail: ngejeong@gmail.com) and T.K. (E-mail: taehokwonk@gmail.com)

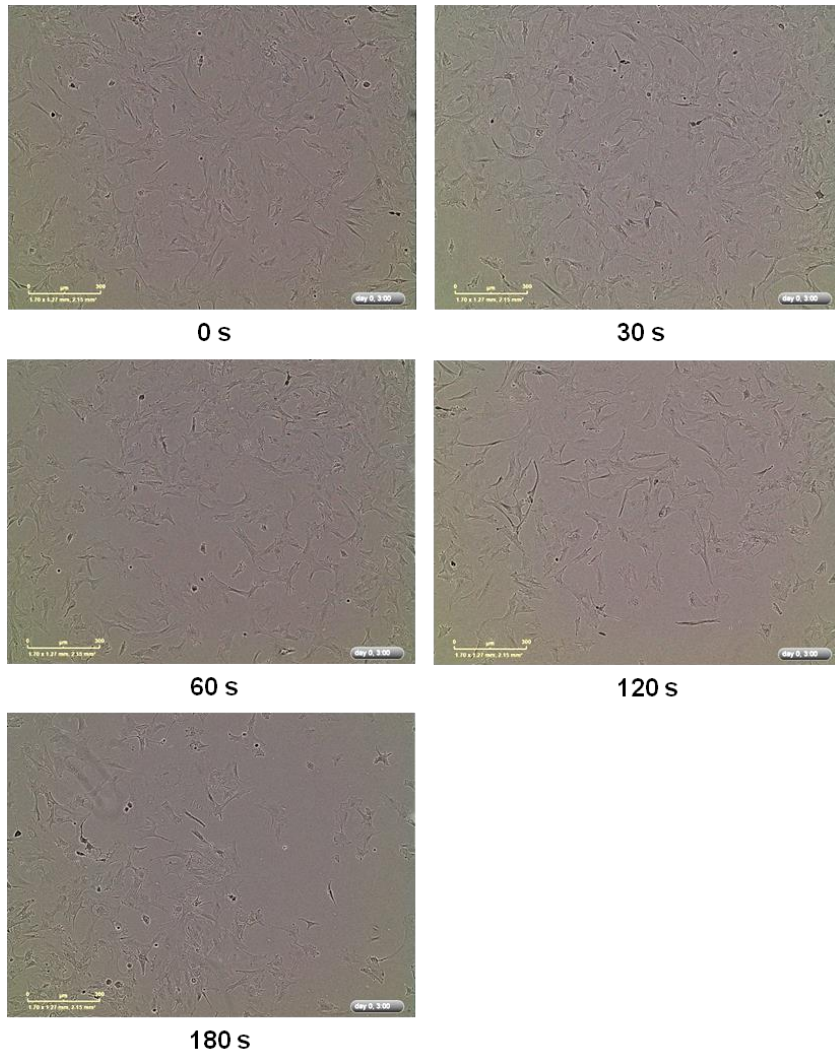

**Supplementary Figure S1.** Growth status of SCs exposed to 11.7 kV for different durations. Scale bar: 300  $\mu\text{m}$ .

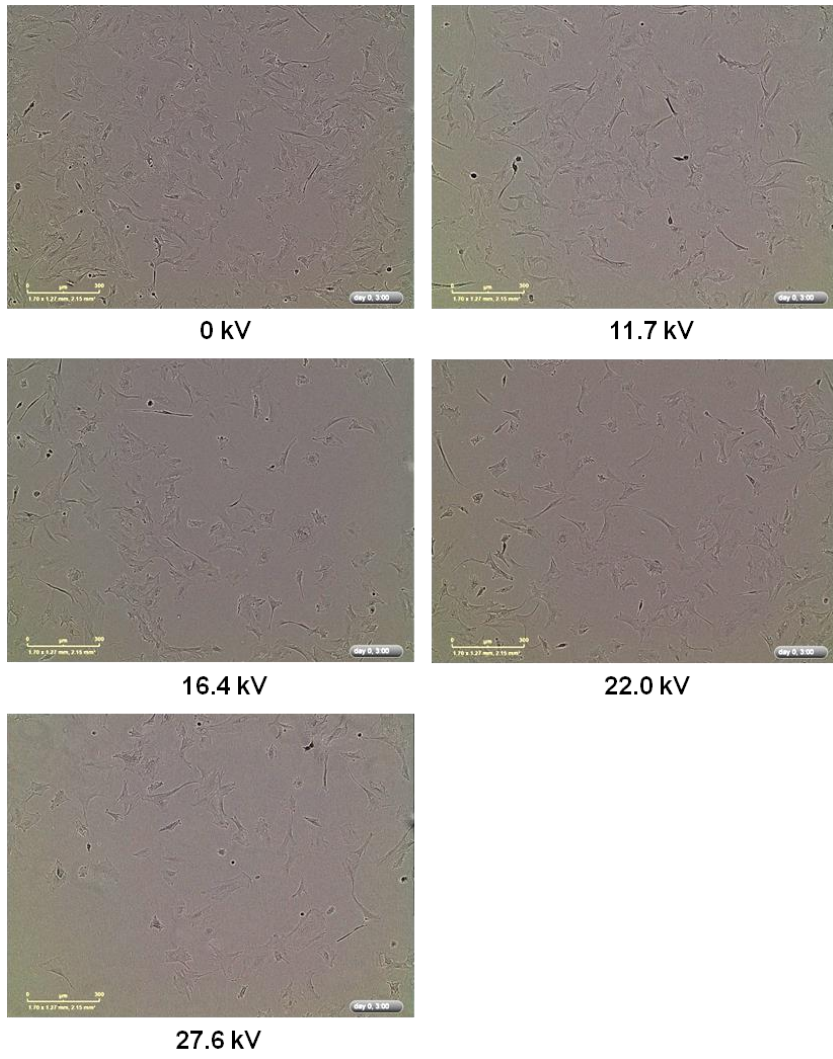

**Supplementary Figure S2.** Growth status of SCs exposed to different potentials for 120 s. Scale bar: 300 μm.

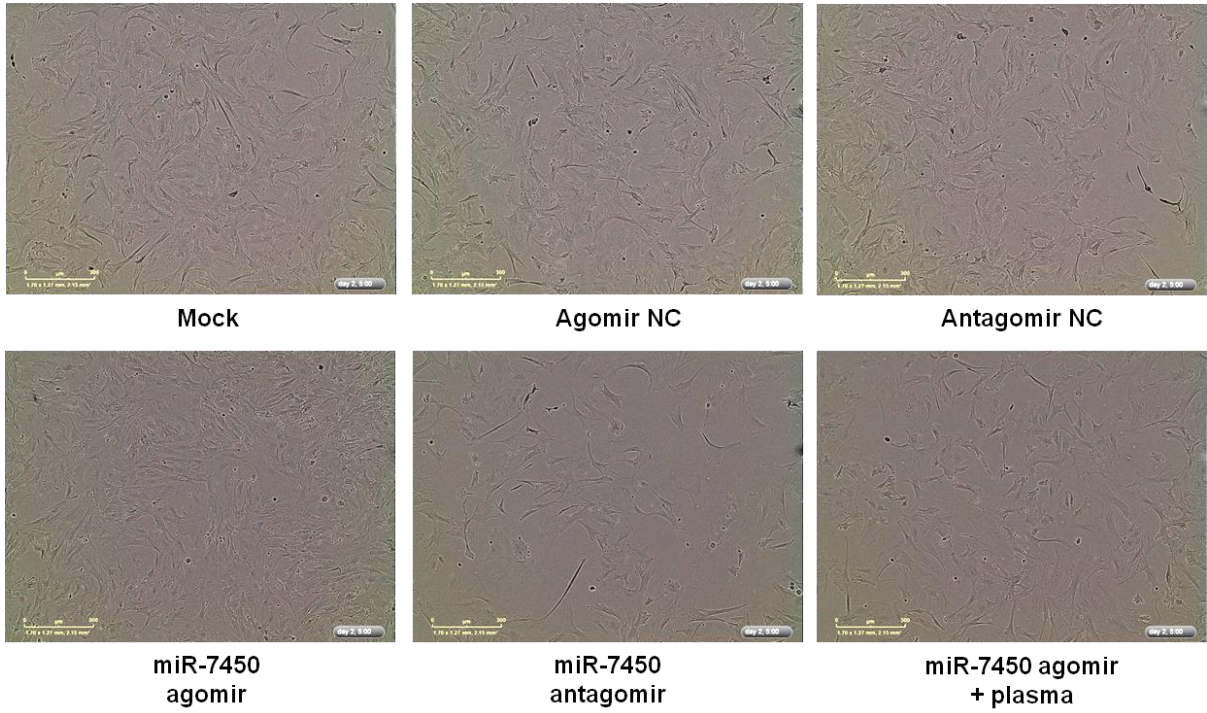

**Supplementary Figure S3.** Growth status of SCs transfected with miR-7450 agomir and antagomir, and miR-7450 agomir-transfected group treated with 22.0 kV of plasma for 120 s. Scale bar: 300 µm.

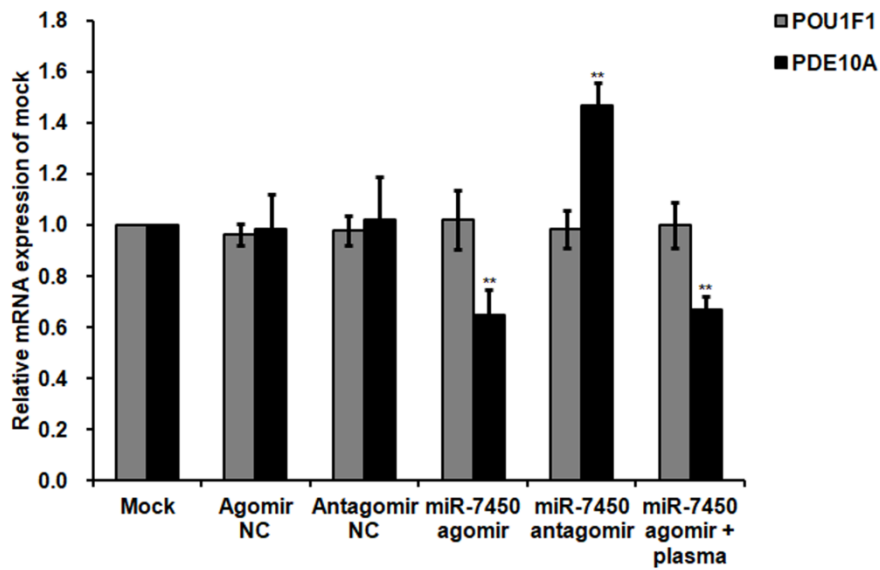

**Supplementary Figure S4.** RT-PCR analysis of a non-target gene (*POU1F1*) and an unrelated target gene (*PDE10A*) of miR-7450 in SCs transfected with miR-7450 agomir and antagomir, and miR-7450 agomir-transfected group treated with 22.0 kV of plasma for 120 s. Data are represented as the mean  $\pm$  SD (n=3 per group). \*,  $p < 0.05$ ; \*\*,  $p < 0.01$ , according to one-way ANOVA and LSD test.

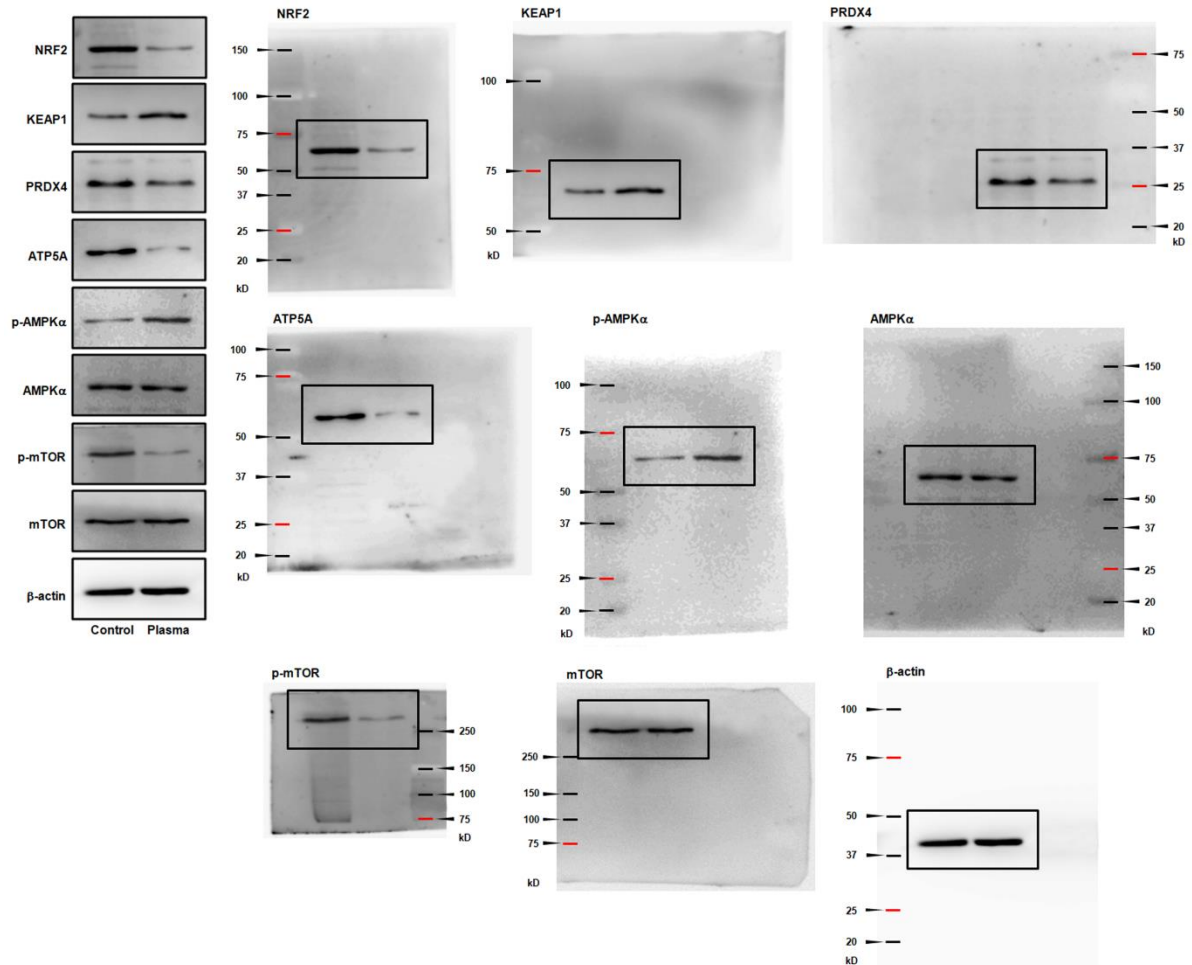

**Supplementary Figure S5.** Western blot analysis of the protein levels of NRF2, KEAP1, PRDX4, ATP5A, p-AMPK $\alpha$ , AMPK $\alpha$ , p-mTOR, and mTOR in SCs exposed to 22.0 kV of plasma for 120 s. Uncropped immunoblot scans for Fig. 3A. The grouping of gels/blots cropped from different gels. All blots were visualized with 5 min exposure time.



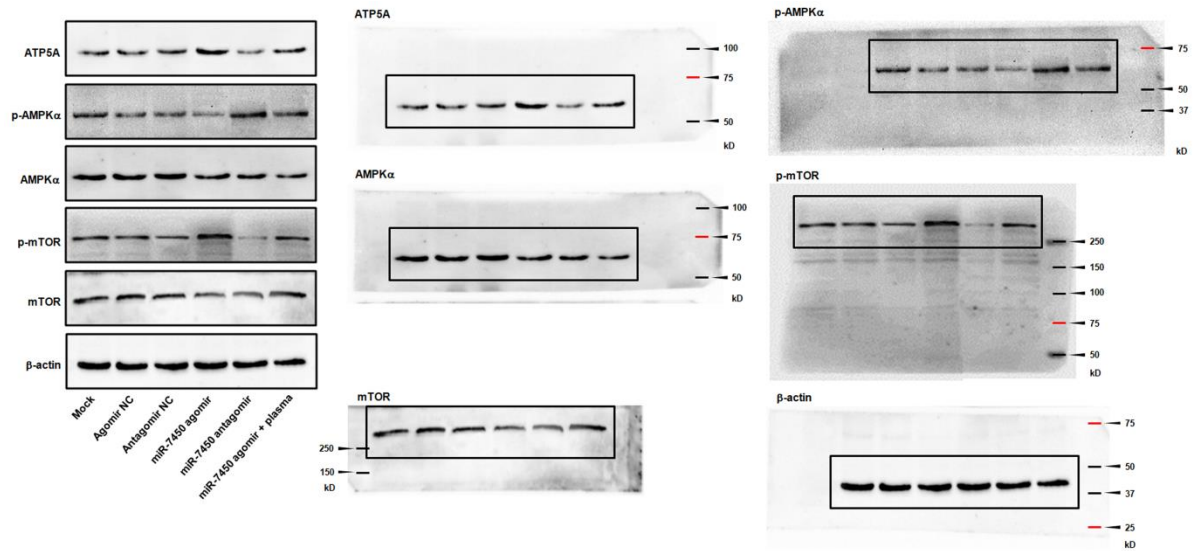

**Supplementary Figure S6.** Western blot analysis of the protein levels of ATP5A, p-AMPK $\alpha$ , AMPK $\alpha$ , p-mTOR, and mTOR in SCs transfected with miR-7450 agomir and antagonist, and miR-7450 agomir-transfected group treated with 22.0 kV of plasma for 120 s.

Uncropped immunoblot scans for Fig. 3F. The grouping of gels/blots cropped from different gels. All blots were visualized with 5 min exposure time.

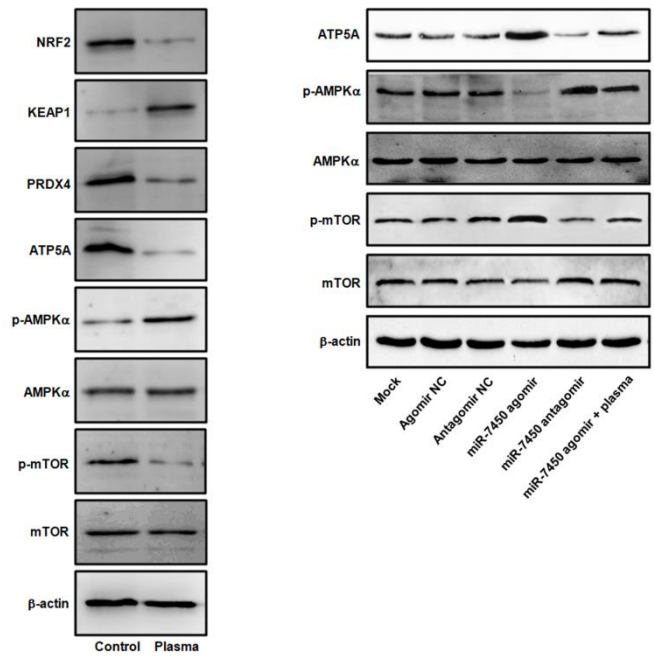

**Supplementary Figure S7.** One independent replicate on chicken SC protein expression. **(A)** Western blot analysis of protein bands in SCs exposed to 22.0 kV of plasma for 120 s. **(B)** Western blot analysis of protein bands in SCs transfected with miR-7450 agomir and antagonir, and miR-7450 agomir-transfected group treated with 22.0 kV of plasma for 120 s.



**Supplementary Table S1.** Primer sequences for the RT-PCR

| Gene           | Sequence number | Sequence position | Product length (bp) | Annealing Temperature (°C) | Sequence (5'to3')                                      |
|----------------|-----------------|-------------------|---------------------|----------------------------|--------------------------------------------------------|
| <i>β-actin</i> | NM_205518.1     | 625-818           | 194                 | 57                         | F: GTGCGTGACATCAAGGAGAAGC<br>R: CCACAGGACTCCATACCCAAGA |
| <i>NOX4</i>    | NM_001101829.1  | 28-157            | 130                 | 57                         | F: CGAGGATCTCAGAAGGTTGC<br>R: GAGCATTACCAGATGAGCA      |
| <i>NRF2</i>    | NM_205117.1     | 484-619           | 136                 | 57                         | F: AAAACGCTGAACCACCAATC<br>R: GCTGGAGAAGCCTCATTGTC     |
| <i>KEAP1</i>   | KU321503.1      | 1227-1485         | 259                 | 57                         | F: GTATCACAGCAGCGTGGAGA<br>R: GCGTAGATGCAGTTGTTGA      |
| <i>SOD</i>     | NM_205064.1     | 106-278           | 173                 | 55                         | F: ATTACCGGCTTGTCTGATGG<br>R: CCTCCCTTTCAGTCACATT      |
| <i>CAT</i>     | NM_001031215.2  | 1067-1276         | 210                 | 55                         | F: CTCATTCCAGTGGCAAGAT<br>R: GTAGGGGCAATTCACAGGAA      |
| <i>GPx</i>     | NM_001277853.2  | 353-474           | 122                 | 55                         | F: ATGTTTCGAGAAGTGCGAGGT<br>R: ATGATGTACTGCGGGTTGGT    |
| <i>PRDX4</i>   | XM_001233999.3  | 595-733           | 139                 | 56                         | F: TGCACTTAGGGGCCTTTTCA<br>R: TTCTCCATGCTTGTCCGTGT     |
| <i>ATP5A1</i>  | NM_204286.1     | 1207-1364         | 158                 | 57                         | F: GGTATCCGTCCAGCCATCAA<br>R: GCATCCAAATCAGACCCAAACT   |
| <i>AMPKα</i>   | NM_001039605.1  | 726-943           | 218                 | 57                         | F: GGAGGCGTGTTTTACATCCC<br>R: AACTTCTCACAGACCTCCCG     |
| <i>mTOR</i>    | XM_417614.5     | 119-309           | 191                 | 57                         | F: TGAAGGGGTCAAGGCAATCC<br>R: GGCGAGCAGTGGTTGTGGAT     |
| <i>POU1F1</i>  | NM_204319.1     | 560-754           | 195                 | 57                         | F: ATGTTGGCGAAGCACTGGC<br>R: GCTTCCTCTTCCGCTCATTCA     |
| <i>PDE10A</i>  | XM_004935551.2  | 3258-3412         | 155                 | 57                         | F: CCACATCAACGATGGAACAG<br>R: ATACAGGGCAAGGTCTGTGG     |
| U6             | NR_003027.2     | 66-85             | 20                  | 60                         | F: CGCAAGGATGACACGCAAAT                                |
| miR-7450       | MI0024118       | 1-20              | 20                  | 60                         | F: TCTGTTCTTAAGGAGGCTGA                                |
